# Supplementary material
Source: PubMed Central journal article supplement (PMC4046788)
Supplement: nn4063962_si_001.pdf [file nn4063962_si_001.pdf]

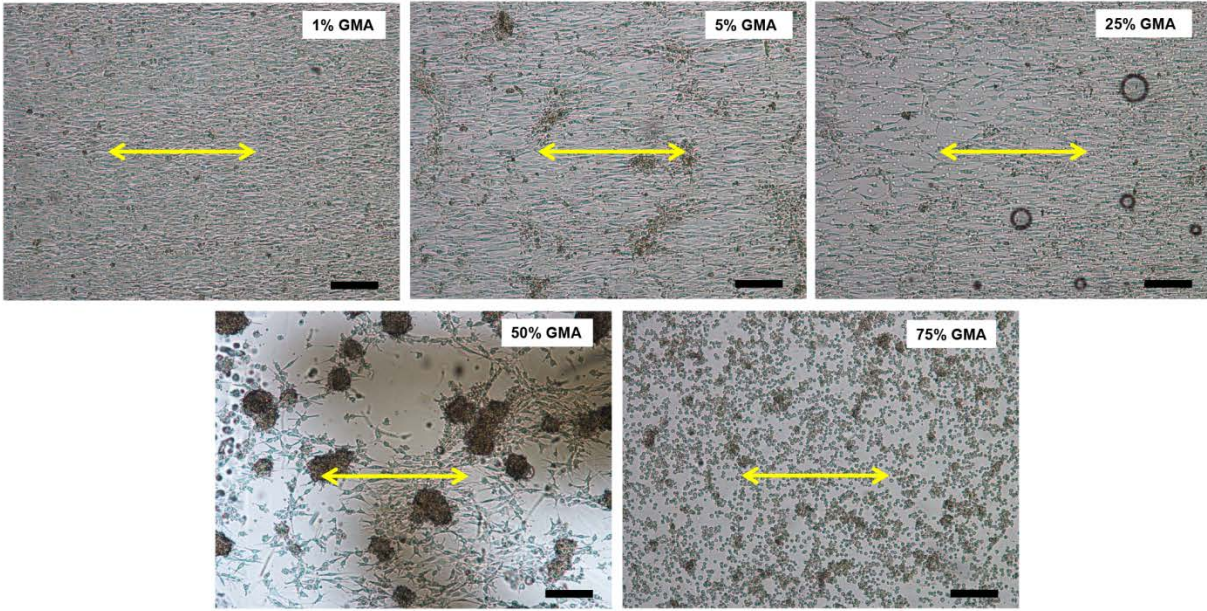

Figure S1

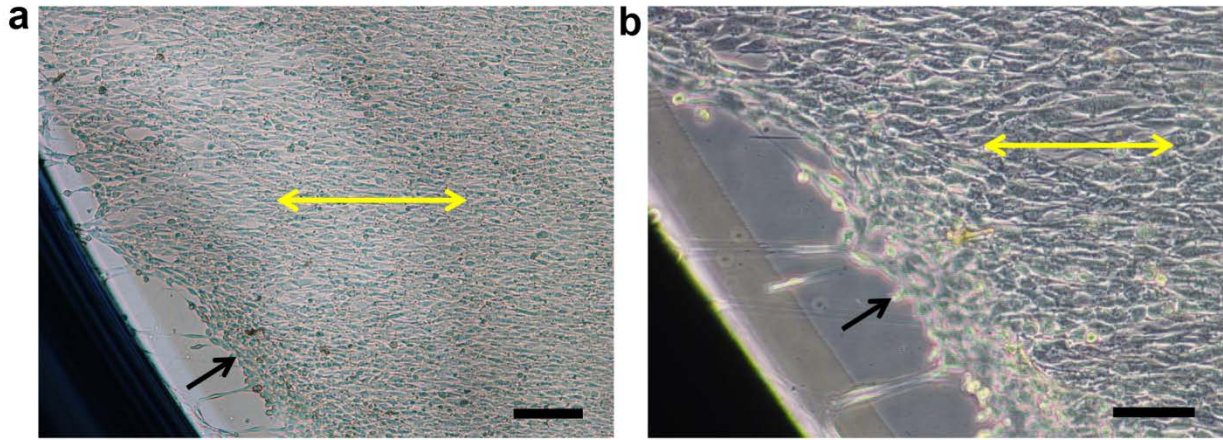

Figure S2

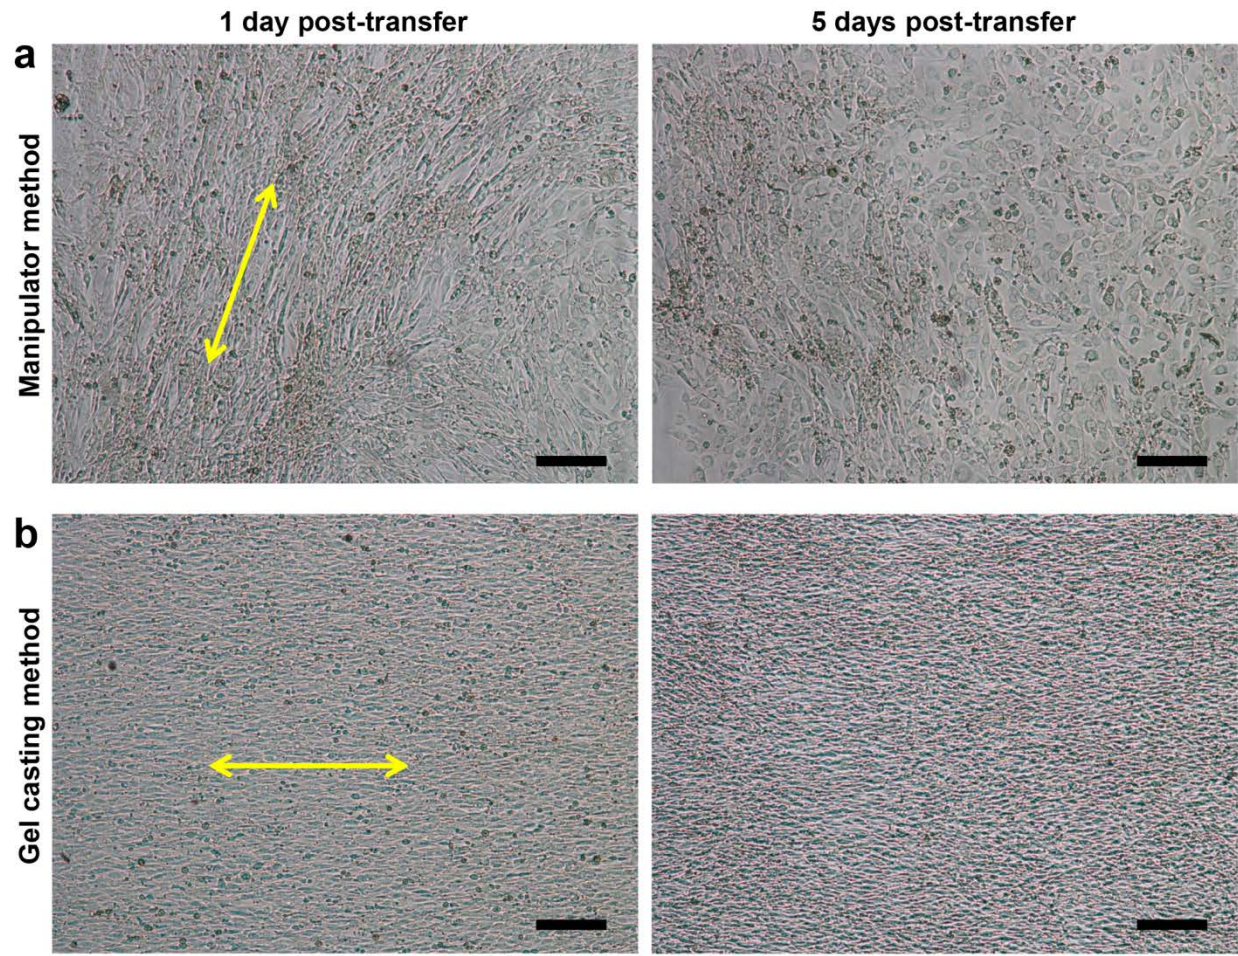

Figure S3

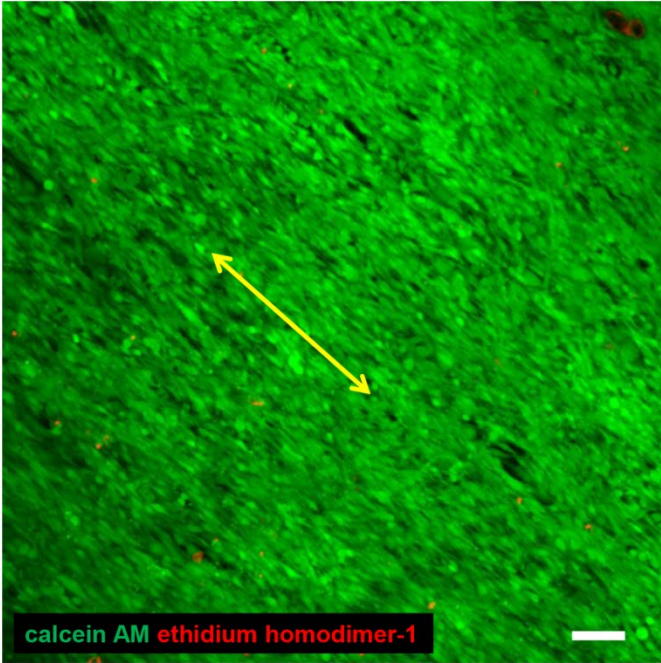

Figure S4

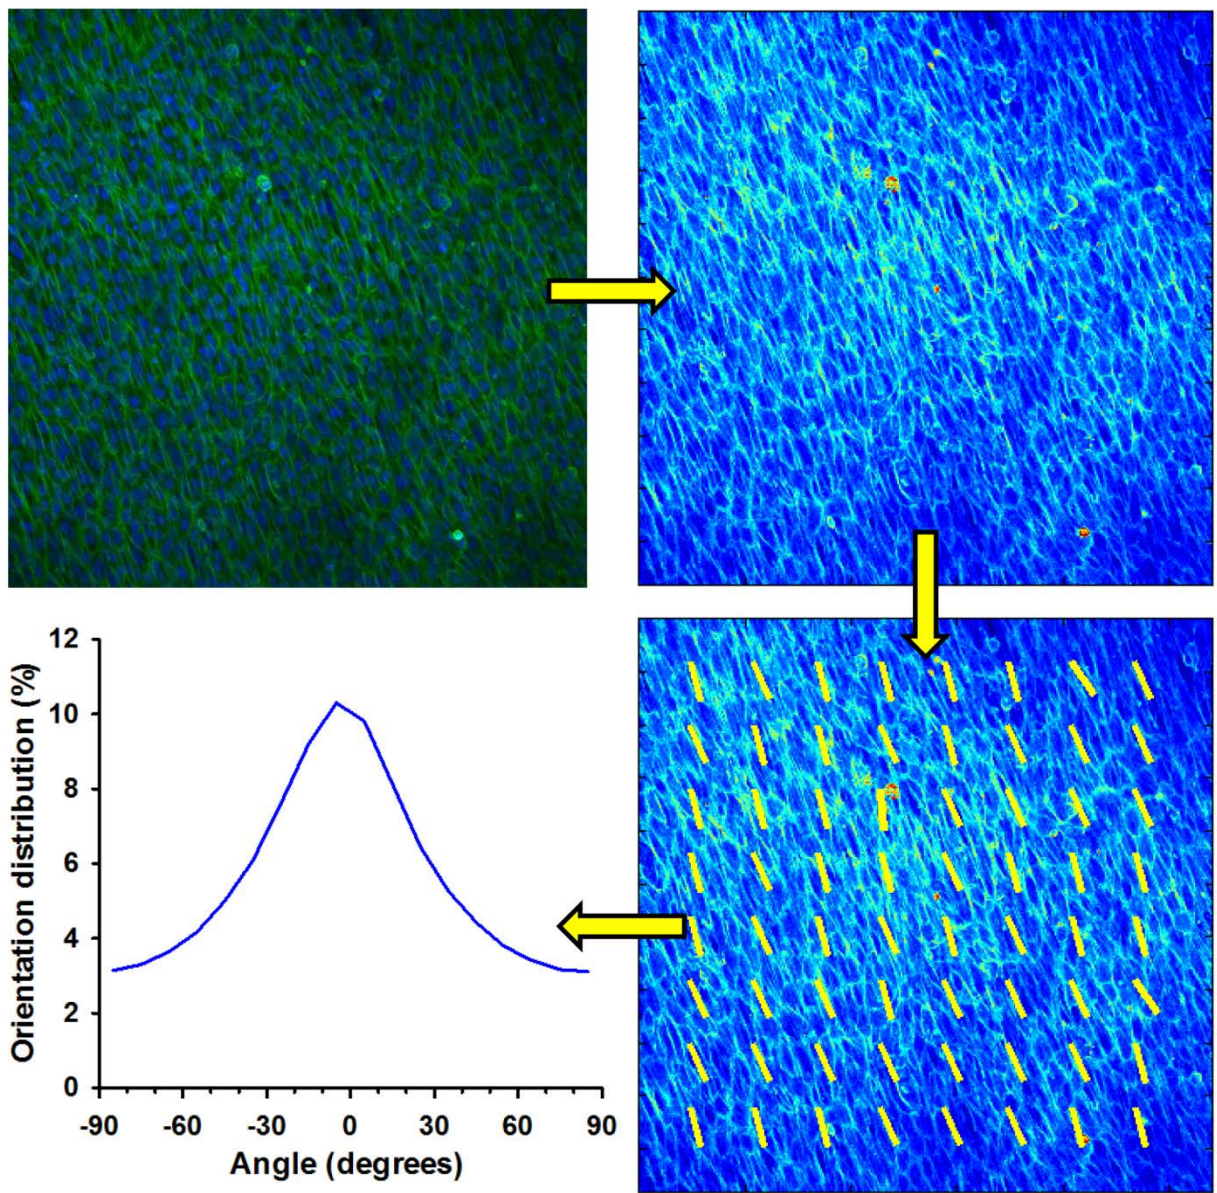

Figure S5

| Sample        | Percent    |            |            |
|---------------|------------|------------|------------|
|               | C1s        | O1s        | N1s        |
| 0% GMA        | 72.1 ± 1.0 | 23.6 ± 0.9 | 4.3 ± 0.2  |
| 1% GMA        | 72.4 ± 0.6 | 23.0 ± 0.5 | 4.5 ± 0.2  |
| 5% GMA        | 71.9 ± 1.0 | 23.8 ± 0.9 | 4.2 ± 0.2  |
| 25% GMA       | 71.2 ± 0.4 | 25.3 ± 0.6 | 2.4 ± 0.1  |
| 1% GMA-PNIPAM | 75.0 ± 0.6 | 12.4 ± 0.3 | 12.3 ± 0.3 |

Table S1
